# Supplementary material for: Analysis of the optimal patterns of serum alpha fetoprotein (AFP), AFP-L3% and protein induced by vitamin K absence or antagonist-II (PIVKA-II) detection in the diagnosis of liver cancers
Source: PeerJ. 2025 Jul 21;13:e19712. doi: 10.7717/peerj.19712 (PMC12288744; doi:10.7717/peerj.19712)
Supplement: Supplemental Information 4 — Age, year, TBIL, ALB, PLT, AFP, AFP-L3%, PIVKA-II and results of diagnostic models for the analysis of this study. [file peerj-13-19712-s004.xlsx]

## Sheet: HCC
Patients (sequence number)	Gender (1 for male, 0 for female)	Gender for ASAP (0 for male, 1 for female)	Age (year)	Platelet (PLT, ×109/L)	Hepatic encephalopathy	Ascites	Total bilirubin（TBIL, μmol/L）	Albumin（ALB, g/L)	Prothrombin time prolonged (seconds)	Child-Pugh grade for liver functions	Performance status (PS) score	Tumor number (single/multiple)	Maximum tumor size (cm)	Tumor thrombus	Metastasis（extrahepatic/lymphatic/no)	Barcelona clinic liver cancer (BCLC) stage	Alpha fetoprotein (AFP, ng/mL)	Protein induced by vitamin K absence or antagonist-Ⅱ (PIVKA-Ⅱ,mAU/mL)	AFP-L3%	GALAD	GALAD-C	C-GALAD	C-GALAD II	GAP-TALAD	ASAP	GAAP	Carcinoembryonic antigen (CEA, ng/mL)	Carbohydrate antigen 19-9 (CA19-9, U/mL)
HCC1	1	0	67	185	No	Yes	12.5	22.1	0.6	B	1	Multiple	7.5	Yes	Extrahepatic and lymphatic	D	341	17570.7	13.26	9.72261	8.99517	12.02	4.73918	12.6227	8.81504	8.60486	3	46.5
HCC2	0	1	58	122	No	No	16.2	37.8	No	A	0	Single	4.2	No	No	A	84.5	3372.75	11.21	4.78946	5.01804	7.38031	2.51767	9.339	5.40548	4.70479	1.6	13.2
HCC3	1	0	66	247	No	No	13.4	33.7	No	A	0	Multiple	11.4	Yes	No	C	55432	16950	32.93	15.5724	12.1524	15.123	7.06289	18.5678	10.8793	10.8528	1.4	11.1
HCC4	0	1	53	118	No	No	12.3	31.5	No	A	0	Single	1.8	No	No	0	80.8	141.84	17.94	2.73283	1.7447	3.24862	1.17764	3.44075	1.65114	0.944048	1.66	26.8
HCC5	1	0	49	303	No	No	22.8	33.8	0.1	A	0	Multiple	9.4	Yes	Lymphatic	C	823940	5782.57	10	15.2468	8.67601	12.5021	2.24314	14.702	10.0376	9.4063	1.7	236
HCC6	1	0	72	174	No	No	7.6	35.8	No	A	1	Single	3.9	No	No	C	216	1327.99	12.78	8.19767	6.63711	8.51472	4.11464	10.8597	6.00125	6.19658	2.5	8.4
HCC7	1	0	50	132	No	No	19.7	40.1	No	A	0	Multiple	3.2	Yes	No	C	913	83259.1	21.81	10.4341	9.89283	14.3094	5.6135	18.1209	10.1572	9.07241	5.6	17
HCC8	0	1	31	606	No	Yes	55.6	34.6	0.7	B	3	Multiple	22.5	Yes	Extrahepatic	D	121000	300000	29.9	13.0843	10.9682	16.2792	-3.16912	15.6259	12.1755	10.1937	0.988	23.2
HCC9	1	0	69	213	No	Yes	16.1	32.4	1.1	B	2	Single	5	No	No	D	286	123.71	19.94	7.12839	4.52841	5.70707	2.69498	6.15806	3.35669	3.5966	2.9	6.1
HCC10	0	1	52	222	No	No	10.5	42.6	No	A	0	Single	3.2	No	No	A	1452	375.14	13.48	5.96188	3.37249	5.3594	0.171814	7.76931	3.89968	3.20356	2	14.3
HCC11	1	0	47	643	No	No	23.2	30.1	0.6	A	0	Single	12.4	No	Lymphatic	C	2.69	362.67	12.47	0.728571	1.20699	3.94069	-9.38261	0.233944	1.54751	0.457813	4.2	25.4
HCC12	1	0	24	246	No	No	14.1	33.9	0.3	A	0	Multiple	13.3	Yes	Lymphatic	C	72397	48861	46.35	13.2121	10.1584	15.6659	4.17236	18.8423	10.2023	8.12203	1.8	12.8
HCC13	1	0	55	105	Grade 3-4	No	16.3	35.3	0.8	B	0	Single	8.7	No	No	D	223	23564.2	7.25	8.14013	7.51483	11.3501	4.22088	13.9264	8.40003	7.58125	9.4	46.5
HCC14	1	0	57	162	No	No	11.7	39.6	No	A	0	Single	3.4	No	No	A	5.76	49.85	5	0.957283	-0.107965	1.49825	-0.891813	2.05458	0.142568	-0.294133	2.4	16.3
HCC15	1	0	60	254	No	Yes	9.8	36.8	No	B	0	Single	5.7	No	No	D	282	68.13	8.85	5.51592	2.21027	3.79404	-0.402087	4.60161	2.2715	2.12848	7.2	2
HCC16	1	0	58	166	No	No	30.6	42.2	No	A	0	Single	2.4	No	Lymphatic	C	419	293.24	14.27	6.79819	4.05089	6.18882	2.21525	7.63519	3.95855	3.63162	1	19.1
HCC17	1	0	60	63	No	No	29.7	35.6	1.2	A	0	Single	2	No	No	A	347	21.56	8.61	5.05252	1.08715	2.29061	2.47242	2.34744	1.08752	1.03814	1.8	18
HCC18	1	0	52	121	No	No	15	37	No	A	0	Single	2.9	No	No	A	35.5	58.5	8.41	2.58425	0.473678	2.41012	0.271636	2.94357	0.854329	0.250808	2.8	30.5
HCC19	1	0	52	131	No	No	12.9	37.5	No	A	0	Multiple	1.6	Yes	No	C	318	94.42	5.64	4.97811	1.56281	3.73072	0.782669	5.00293	2.30961	1.76936	1.3	2
HCC20	1	0	52	155	No	No	83.8	29.1	0.4	B	0	Single	3.8	Yes	No	D	52.3	18.32	8.27	2.30178	-0.587193	0.967944	-1.0724	-4.35021	-0.265154	-0.766181	2.9	59.4
HCC21	1	0	58	261	No	Yes	12	39.9	No	A	0	Single	8.7	No	No	D	13686	998.98	21.23	11.3275	7.08921	9.6377	2.97742	12.585	6.78595	6.52558	2.7	36.4
HCC22	1	0	55	174	No	No	13.4	41.3	No	A	0	Single	7.7	No	No	A	3.58	362.87	5	1.44056	1.55851	3.93269	-0.565705	5.07918	2.04217	1.34395	2.2	10.6
HCC23	1	0	62	302	No	Yes	16.9	38.9	0.2	A	0	Single	8.3	No	Lymphatic	D	4120	922.28	14.01	10.1325	6.43818	8.78855	1.53909	10.7717	6.37717	6.25814	6.4	3.7
HCC24	1	0	72	169	No	No	12.9	33.8	No	A	0	Single	14.7	No	No	A	2.41	2982.82	5	3.78517	5.25991	7.39946	2.32725	8.30709	4.99645	4.93076	4.5	28.2
HCC25	1	0	53	244	No	No	27.6	37.5	0.2	A	0	Single	1.5	No	No	0	4.51	105.17	5	0.779889	0.173261	2.24564	-2.62929	1.20072	0.677659	-0.0140909	2.4	38.8
HCC26	1	0	66	284	No	No	22.4	32	No	A	0	Single	6.2	No	Lymphatic	C	11.8	9741.44	5	5.54307	6.46049	9.35892	0.603833	9.42331	6.69551	6.33031	1.03	38.3
HCC27	1	0	60	157	No	No	28.8	41.9	No	A	0	Single	2.1	No	No	A	2.64	13.84	5	-0.305736	-1.41121	-0.415995	-1.3948	-0.998784	-1.46326	-1.69901	3.6	2
HCC28	0	1	61	302	No	No	11.1	45.3	No	A	0	Multiple	4.8	No	No	B	4807	4535.7	10.48	9.30812	7.04012	9.42325	1.02838	13.0066	7.57998	7.18088	8.5	58.1
HCC29	1	0	45	278	No	Yes	14.8	43.8	2.1	A	0	Multiple	8.7	Yes	Lymphatic	D	104425	30000	11.03	13.7798	9.2919	13.8407	2.46688	18.2608	10.7978	9.76387	2.7	31.8
HCC30	1	0	46	201	No	No	18.8	44	No	A	0	Single	0.39	No	No	0	145	29.43	10.99	3.18069	-0.123961	1.91324	-1.48653	2.94951	0.40952	-0.364522	1.2	10.8
HCC31	1	0	65	180	No	No	13.4	40.6	No	A	0	Multiple	7.1	Yes	No	C	95.5	2008.88	16.7	7.13414	6.35749	8.70407	3.48677	11.3127	5.78728	5.5843	5.6	2
HCC32	1	0	57	551	No	Yes	20.8	41.9	No	A	0	Multiple	12.1	Yes	Lymphatic	D	9587	30000	14.62	12.5765	9.87079	13.6771	-1.57503	15.8431	10.349	9.77593	4.6	10.3
HCC33	1	0	56	200	No	No	14.9	37.2	0.1	A	0	Single	9.2	No	No	A	8.87	35.27	5	1.10619	-0.404678	1.14867	-1.72779	0.901225	-0.104094	-0.543399	2.5	14.5
HCC34	1	0	55	117	No	Yes	16.3	32.6	0.4	B	0	Multiple	17.9	Yes	Extrahepatic	D	5140	6910.54	12.77	10.841	7.80303	11.2321	4.99505	13.6819	8.36977	7.78168	4.9	2
HCC35	1	0	61	229	No	No	16.4	35	No	A	0	Single	8.4	No	No	A	2.69	13226.7	5	3.76715	5.7401	8.98744	0.710657	9.84762	6.17561	5.48498	2	10
HCC36	1	0	39	294	No	No	27.1	35.9	1.6	A	0	Multiple	11.7	Yes	Lymphatic	C	74878	18815.8	7.33	12.4843	7.82752	12.58	0.753492	14.521	9.86178	8.56307	1.2	24.9
HCC37	1	0	66	275	No	No	13.4	34.8	0.3	A	0	Single	5.9	No	Lymphatic	C	2.71	40.18	5	0.876481	0.286574	1.31056	-2.26928	0.377568	0.0056958	-0.0229974	28.8	74.9
HCC38	1	0	56	164	No	No	121.8	34.4	1	B	0	Multiple	10.5	Yes	No	D	30400	30000	9.35	13.4485	9.80808	13.7446	4.75422	10.7324	10.7898	10.2212	3.3	31.9
HCC39	1	0	58	281	No	No	10.5	38.4	No	A	0	Multiple	15.2	No	No	B	4.15	43694	5	4.62799	6.82812	10.6506	0.159463	12.5591	7.53945	6.63866	3	28.5
HCC40	1	0	70	187	No	No	16.8	39.4	No	A	0	Single	6.4	No	No	B	3.61	7524.09	5	4.55025	6.15924	8.72771	2.32641	10.5491	6.09638	5.88633	2	2
HCC41	1	0	49	86	No	No	24.7	39.6	1.1	A	0	Single	0.4	Yes	No	C	2.45	2941.04	5	1.72375	2.97444	6.37457	1.1556	7.46213	3.91455	2.7619	1	2
HCC42	1	0	66	139	No	Yes	8.7	32.3	No	B	0	Multiple	6.7	No	No	D	6.21	1894.23	5	3.94482	4.54505	6.88047	2.30309	7.8901	4.6145	4.34055	4.3	56.4
HCC43	1	0	34	512	No	No	76.8	36.6	No	B	0	Single	9.1	No	No	D	2.63	344.33	5	-0.793127	-0.686829	2.81869	-9.47677	-2.78821	0.874005	-0.828275	0.7	2
HCC44	0	1	60	199	No	No	9.7	35.1	No	A	0	Multiple	4.1	No	Lymphatic	C	6.92	159.76	5	0.416461	0.718688	1.95898	-1.48412	1.94943	1.07111	0.576394	3.6	2
HCC45	0	1	50	251	No	No	15.7	43.8	No	A	1	Single	3.3	No	No	C	1.93	131.11	5	-1.89534	-0.940041	0.758859	-4.10631	0.993708	-0.153354	-1.16424	2.2	29.8
HCC46	1	0	79	52	No	Yes	22.9	38.3	No	A	0	Single	3.4	No	No	D	1.96	70.4	5	2.04115	2.03116	2.52233	3.36548	3.06355	1.09527	1.6263	2.4	19.5
HCC47	1	0	71	172	No	No	28.3	39.9	No	A	0	Multiple	3.8	No	No	B	1.42	51.15	5	0.809119	0.793633	1.61113	0.00115337	1.15678	0.232782	0.394079	2.4	24
HCC48	1	0	73	165	No	No	30	36	0.3	A	0	Multiple	2.4	No	No	A	5.41	38.7	5	2.18734	1.19323	1.83312	0.659123	0.924201	0.582893	0.919322	1.5	5.4
HCC49	1	0	53	213	No	No	7.7	41.1	No	A	0	Single	1.3	No	No	0	2.75	29.5	5	-0.457098	-1.3123	0.323111	-2.74539	0.702952	-0.936221	-1.55698	5.2	2
HCC50	1	0	60	156	No	No	11.7	39	0.1	A	0	Single	4.2	No	No	B	1.15	29.24	5	-0.718217	-0.946443	0.283955	-1.2252	0.320504	-0.987656	-1.31553	3.6	6.8
HCC51	1	0	65	121	No	No	16.2	32.1	0.9	A	0	Single	6	No	No	B	2.3	27.31	5	0.396751	-0.268684	0.677307	0.155842	-0.264386	-0.536996	-0.59208	1.1	4.1
HCC52	1	0	60	200	No	No	20.1	39.6	No	A	0	Single	11.6	No	Lymphatic	C	1.32	27.11	5	-0.621795	-0.9738	0.233868	-2.04781	-0.350994	-1.01301	-1.32915	3	5.8
HCC53	1	0	45	443	No	No	5.8	38.3	No	A	0	Single	3	No	No	B	4.51	25.24	5	-0.764448	-2.08395	-0.0512974	-7.72224	-1.26068	-1.27292	-2.23874	2.9	25
HCC54	1	0	50	132	No	No	16.6	34.8	No	A	0	Single	1.7	No	No	0	8.01	23.58	5	0.229983	-1.44926	0.296757	-1.41182	-0.366913	-0.872144	-1.57053	2.1	2
HCC55	0	1	54	60	No	Yes	28.1	30.4	No	A	0	Multiple	7	Yes	No	D	6609	23.22	5	5.73571	0.647812	1.7039	1.62724	1.28068	1.55825	1.22875	2.4	27.3
HCC56	1	0	60	170	No	No	10	43	No	A	0	Multiple	2.6	No	No	A	3.28	22.06	5	0.18414	-0.853383	0.302782	-1.25774	1.15254	-0.85632	-1.11651	3.1	9.3
HCC57	1	0	79	142	No	No	6.3	35.9	0.4	A	0	Single	2	No	No	B	1.29	21.57	5	0.932801	0.664117	0.749494	1.11196	0.990508	-0.388755	0.210222	3	12.3
HCC58	0	1	57	77	No	Yes	27.9	42.4	No	A	0	Single	2.1	No	No	D	5.57	18.45	5	-1.32092	-1.87367	-1.19822	-0.785535	-1.29611	-1.54623	-2.03445	3.3	2
HCC59	1	0	52	31	No	Yes	42.9	20.7	4.4	C	0	Multiple	2.5	No	No	D	1.09	8.59	5	-2.20021	-3.0156	-1.75801	-0.604039	-6.46931	-2.73739	-3.35656	0.9	8.4
HCC60	1	0	56	130	No	Yes	34.1	24.2	0.1	C	0	Multiple	9.2	No	No	D	32241	17809.7	42.65	14.5391	11.7251	15.1545	8.73378	16.2479	10.2384	9.71061	2.9	37.7
HCC61	0	1	57	238	No	No	10.3	40.6	No	A	0	Multiple	2.5	No	No	A	21.1	26.47	18.32	0.773884	-0.0448524	0.644752	-1.72823	1.09373	-0.584678	-1.03961	0.5	29.9
HCC62	1	0	47	276	No	Yes	14.5	38	No	A	0	Multiple	17.7	Yes	Lymphatic	D	178	898.17	22.95	5.93195	4.43244	7.44811	0.121865	8.70179	4.32072	3.35263	2	7.6
HCC63	1	0	72	179	No	No	14.2	33.6	No	A	0	Multiple	8.8	No	Extrahepatic	C	52	132.37	15.43	5.52463	3.94374	4.99193	2.69382	5.57166	2.85132	3.15179	84.2	1922
HCC64	1	0	67	229	No	No	35.1	33.8	No	B	0	Multiple	14.5	No	Lymphatic	D	121000	300000	10	17.1983	13.8125	17.9385	6.80928	20.9528	14.4315	14.2767	1.9	23.7
HCC65	1	0	59	406	No	Yes	118.1	26.2	No	C	0	Multiple	17.9	Yes	No	D	435	430.49	13.29	7.10884	4.48619	6.70871	-2.29219	-0.736525	4.44536	4.13931	3.4	88.8
HCC66	1	0	77	122	No	No	18.8	38.6	No	A	0	Single	2.8	No	No	A	8.98	13.9	5	2.47088	0.722839	0.80843	1.62635	1.07387	-0.148042	0.475529	0.8	46.7
HCC67	1	0	52	258	No	Yes	29.9	36.6	No	A	0	Multiple	11.9	No	Lymphatic	D	121000	173192	10	15.531	11.7634	16.5298	4.33775	19.6901	13.1243	12.2998	1.9	26.1
HCC68	1	0	65	135	No	Yes	23.1	26.3	No	B	0	Multiple	15	Yes	Extrahepatic	D	294	906.78	9.79	7.54101	5.44662	7.6169	3.58939	7.46249	5.38319	5.28897	3.2	145
HCC69	1	0	73	188	No	No	21.3	41.9	No	A	0	Single	2.8	No	No	A	17.4	23.51	10.87	3.32145	1.53621	1.97269	0.997818	2.59814	0.525549	0.950927	4.2	75.2
HCC70	0	1	64	118	No	Yes	10.5	39.7	No	A	0	Multiple	9.6	No	No	D	6.33	93.73	5	0.377883	0.5347	1.374	0.153692	2.35614	0.630775	0.360494	2.1	2
HCC71	1	0	56	95	No	No	7.2	26.5	No	B	0	Single	5.5	Yes	No	D	3.9	2434.45	5	2.717	3.64295	6.60362	1.93048	6.7679	4.22865	3.44207	2.8	29.9
HCC72	1	0	53	219	No	No	32.3	30.2	No	A	0	Multiple	3	No	No	B	36.7	355.36	11.16	3.86011	2.63778	5.09881	-0.335688	3.63924	2.90891	2.22197	3.5	35
HCC73	1	0	51	126	No	Yes	12	25.7	No	B	0	Multiple	5.5	No	No	D	534	1452.08	31.22	8.01669	6.32614	9.22206	4.69123	9.97761	5.50239	4.73772	4.9	79.3
HCC74	1	0	41	198	No	Yes	196.7	23.7	6.8	C	0	Multiple	20.1	Yes	Lymphatic	D	109178	300000	24.34	15.3274	12.2478	17.6584	5.06134	9.16424	13.1748	11.7847	4.2	3031
HCC75	1	0	64	168	No	Yes	23.7	32.7	0.1	B	0	Multiple	12.4	Yes	No	D	26971	6896.09	22.25	13.7136	9.98866	12.8596	6.52783	15.2949	9.4877	9.40017	5.9	26.2
HCC76	1	0	73	199	No	No	32.3	42.7	No	A	0	Single	3.8	No	No	B	1.73	22320.3	5	4.7008	7.30429	10.0589	2.65408	11.6635	7.12741	6.94665	3.3	26
HCC77	1	0	75	125	No	Yes	81.9	25.7	2.6	C	1	Single	16.8	No	Extrahepatic and lymphatic	D	34638	118563	46.94	17.5885	15.8917	18.8718	12.1161	18.412	13.2504	13.4863	4.7	2
HCC78	1	0	52	87	No	No	235.5	29.2	No	B	1	Multiple	9.8	No	No	D	1086	7734.41	40.39	10.161	9.07081	12.3962	6.45814	1.32423	7.69756	6.88946	3	166
HCC79	0	1	65	66	No	Yes	23.2	39.2	No	B	2	Multiple	2.6	No	No	D	7590	747.34	38.45	10.2095	7.79325	9.07946	7.70393	12.1406	5.96669	5.90962	2.9	29.4
HCC80	1	0	31	304	No	Yes	17.2	42	No	A	0	Single	12.7	No	No	D	6697	13609.5	32.35	10.1246	7.64869	12.4349	1.16689	15.472	8.11063	6.34865	2	37.5
HCC81	1	0	48	207	No	No	11.7	33.9	No	A	0	Multiple	3.4	Yes	No	C	2582	239.59	32.05	8.34067	4.81476	7.2925	2.63593	8.70824	4.03677	3.33288	9.1	55.3
HCC82	1	0	73	194	No	Yes	37.6	28.2	No	B	0	Multiple	8.7	Yes	Lymphatic	D	7947	12360	28.52	13.8697	11.4907	13.9762	7.49974	14.9105	10.0364	10.2773	5.1	155
HCC83	0	1	64	344	No	No	10	42.2	No	A	0	Single	7.3	No	No	A	92.2	28.25	24.46	3.18572	1.70116	1.99506	-1.73697	2.75298	0.436855	0.37467	0.6	20.2
HCC84	1	0	64	232	No	No	17.1	43.3	No	A	1	Single	11.7	No	No	A	116431	12386.3	22.99	15.5678	11.1775	14.2665	6.22867	18.9923	10.7528	10.6879	1.8	21.1
HCC85	1	0	53	148	No	No	35.3	31.8	No	B	0	Multiple	3.8	No	No	D	22213	953.94	22.2	11.3818	6.79434	9.60208	4.58445	10.4155	6.70623	6.23429	4.5	432
HCC86	1	0	43	168	No	No	17	38.3	No	A	0	Single	3.1	No	Lymphatic	C	3411	733.33	21.49	8.39739	4.79896	8.03878	2.34939	10.2017	5.15742	4.14733	2.5	12.3
HCC87	0	1	72	141	No	No	9.6	34.7	No	A	0	Single	7.2	No	No	A	3061	23542.2	21.25	11.2215	10.4414	12.6566	6.86943	16.217	9.72266	9.7033	1.2	52.8
HCC88	1	0	52	244	No	No	15.5	42.4	No	A	1	Multiple	10	No	Extrahepatic	C	29554	22002.5	19.71	13.2951	9.83975	13.7879	4.15156	18.0038	10.2486	9.51209	4.8	44.3
HCC89	1	0	35	231	No	No	19	38.2	No	A	0	Multiple	8	No	No	B	33550	1584.15	19.69	10.3734	5.50027	9.50167	1.23342	11.7606	6.60103	5.25836	1	13.5
HCC90	1	0	59	320	No	Yes	42.8	30.2	No	B	2	Single	16.4	No	No	D	7603	83956	19.45	13.3085	11.3933	15.3827	3.61407	15.8796	11.4817	10.9175	2.2	328
HCC91	1	0	42	326	No	No	11.8	39.3	No	A	0	Multiple	13.6	No	No	B	4064	73613.9	18.79	11.0396	9.29868	14.1732	1.36809	17.4402	10.2786	8.89113	0.8	22.8
HCC92	1	0	43	121	No	No	10.8	38.9	No	A	0	Multiple	3.9	No	No	B	844	6762.8	17.61	8.10611	6.28708	10.2852	3.43807	13.4919	7.02272	5.78713	2	39
HCC93	1	0	60	204	No	No	15.7	39.8	No	A	0	Single	8.6	No	No	A	386	36862.9	17.48	9.81538	9.41619	13.0353	4.38104	16.3782	9.35967	8.76938	3.1	2.9
HCC94	1	0	61	72	No	No	21.8	36.4	0.5	A	0	Multiple	4.7	No	No	B	13.5	196.13	16.27	3.42486	2.82776	4.57836	3.16456	5.31269	2.20288	1.89332	0.6	34.7
HCC95	1	0	62	128	No	No	17.5	40.3	No	A	1	Single	1.8	No	No	0	26.2	28.06	15.86	3.04918	1.14243	2.20148	1.54637	3.0905	0.380678	0.290748	2.4	14.3
HCC96	1	0	71	233	No	Yes	23.9	36	No	A	0	Multiple	14.5	No	Extrahepatic and lymphatic	D	56.3	9624.09	14.35	7.94806	8.19564	10.752	3.50348	12.1885	7.57553	7.51801	6.4	2
HCC97	1	0	34	173	No	No	17.2	32.1	No	A	0	Multiple	14.2	No	Lymphatic	C	1179	206.76	14.24	5.48651	1.69135	5.05234	-0.415539	5.27434	2.88947	1.4985	1.7	26.2
HCC98	1	0	58	278	No	No	15.7	36.6	No	A	0	Multiple	3.6	Yes	Lymphatic	C	38.5	75.24	14.2	3.58365	1.77831	3.41303	-1.18489	3.35228	1.44671	1.1124	4.1	55.9
HCC99	1	0	64	304	No	Yes	25.9	29.6	1.9	B	0	Multiple	18.9	No	No	D	1672	110997	14.02	12.1634	11.2261	15.059	3.65343	16.339	11.3838	10.9679	3.6	60.9
HCC100	1	0	50	236	No	No	8.1	38.7	No	A	0	Single	6.3	No	Lymphatic	C	27	451.01	13.78	3.52066	2.66478	5.33873	-0.617573	6.59989	2.90269	2.04249	2.8	13.9
HCC101	0	1	66	60	No	No	37	34.7	No	B	0	Multiple	3.5	No	No	D	307	586.89	13.33	5.89528	4.64015	5.97864	4.26903	6.42045	4.39118	4.25525	2.5	20.1
HCC102	1	0	59	225	No	No	27.6	40.9	No	A	0	Single	7.6	No	Lymphatic	C	435	188.51	13.2	6.62826	3.63182	5.57766	0.975086	6.57466	3.53273	3.28721	2.8	7.5
HCC103	0	1	75	244	No	Yes	10.5	35	No	A	2	Single	14.8	No	No	D	223	9880.6	13.17	8.0049	8.30165	10.0896	3.28855	12.2416	7.79661	7.86538	4.5	2
HCC104	1	0	59	256	No	No	11.6	37.9	No	A	0	Multiple	1.8	No	No	B	91.6	262.21	13.14	5.23324	3.3979	5.42482	0.117676	6.51124	3.23931	2.89971	0.6	18.3
HCC105	1	0	52	129	No	No	15.4	41.9	No	A	0	Single	3.8	No	Lymphatic	C	11.1	43.31	12.22	1.38152	0.0190258	1.79358	-0.0331827	2.76134	0.030943	-0.602699	1.5	13.6
HCC106	1	0	67	210	No	No	16.2	34.5	No	A	0	Single	12.1	No	No	A	64.1	5542.8	11.38	7.28241	7.06368	9.68683	2.99305	11.1925	6.83387	6.63328	4.5	35.7
HCC107	1	0	57	208	No	No	17.3	44.4	No	A	0	Single	5	No	No	A	40.9	19.55	11.04	2.65026	0.0870385	1.35651	-0.959069	2.3329	-0.0638819	-0.344021	1.7	47.9
HCC108	1	0	64	118	No	No	15.8	32.4	No	A	0	Multiple	6.4	No	Lymphatic	C	10.7	469.78	10.2	3.72038	3.49364	5.42901	2.44896	5.84752	3.21004	2.96804	1.4	27.2
HCC109	1	0	45	241	No	Yes	41.4	31.8	3.3	B	0	Multiple	7.3	Yes	Lymphatic	D	121000	172147	10	14.8975	11.0642	16.2135	3.79515	17.8541	12.791	11.6356	8	82.1
HCC110	1	0	42	197	No	Yes	28.5	30.6	No	B	0	Multiple	10.1	Yes	No	D	50899	74386.9	10	13.2628	9.58985	14.6052	3.62327	16.5381	11.3579	10.0831	4.8	320
HCC111	1	0	32	315	No	No	9.4	44.3	No	A	0	Single	22.1	No	No	A	538	57330.4	10	7.58868	6.67268	12.0616	-1.19687	15.4966	8.68143	6.74824	2.3	6.1
HCC112	1	0	44	349	No	No	10.9	43.8	No	A	0	Single	14.3	Yes	Lymphatic	C	121000	702.44	10	11.6297	5.31692	8.67192	-0.736076	11.7943	6.6641	5.86462	1.7	18.5
HCC113	1	0	55	94	No	No	22.4	35.3	No	A	1	Single	13.9	No	No	A	31.6	216.98	9.91	3.55311	2.18346	4.37824	1.79474	4.79485	2.39382	1.831	3.1	56.3
HCC114	1	0	53	146	No	No	12.2	39.3	No	A	1	Multiple	3.7	No	No	B	74.7	359.4	9.21	4.51089	2.76631	5.26452	1.12408	6.97007	3.22163	2.56575	2.7	7.5
HCC115	1	0	51	142	No	No	24.9	33.9	No	A	1	Multiple	11.5	No	Lymphatic	C	30.3	3828.59	9.2	4.78002	4.66732	8.05325	1.73	8.65305	5.3618	4.39733	1.6	27.7
HCC116	1	0	47	385	No	No	33.4	30.8	No	A	1	Multiple	10.1	Yes	Lymphatic	C	476	219116	9.08	9.5519	9.42238	14.4438	-0.354239	14.5954	10.8115	9.48455	1.3	29.9
HCC117	1	0	64	178	No	No	13.4	32.3	No	A	3	Single	5.8	Yes	No	C	117	1324.86	8.32	6.67484	5.29345	7.64287	2.47116	8.70137	5.36633	5.15564	2.5	121

## Sheet: CCA
Patients (sequence number)	Gender (1 for male, 0 for female)	Gender for ASAP (0 for male, 1 for female)	Age (year)	Platelet (PLT, ×109/L)	Hepatic encephalopathy	Ascites	Total bilirubin（TBIL, μmol/L）	Albumin（ALB, g/L)	Prothrombin time prolonged (seconds)	Child-Pugh grade for liver functions	Performance status (PS) score	Tumor number (single/multiple)	Maximum tumor size (cm)	Tumor thrombus	Metastasis（extrahepatic/lymphatic/no)	Alpha fetoprotein (AFP, ng/mL)	Protein induced by vitamin K absence or antagonist-Ⅱ (PIVKA-Ⅱ,mAU/mL)	AFP-L3%	GALAD	GALAD-C	C-GALAD	C-GALAD II	GAP-TALAD	ASAP	GAAP	Carcinoembryonic antigen (CEA, ng/mL)	Carbohydrate antigen 19-9 (CA19-9, U/mL)
HD1	1	0	59	205	No	No	13.3	43.8	No	A	0	Single	3.5	No	No	2.86	34.13	5	0.206968	-0.554318	0.800866	-1.85898	1.49342	-0.47855	-0.824218	5.67	48.5
HD2	1	0	58	218	No	Yes	215.1	33.7	1.3	B	0	Multiple	16.9	No	Extrahepatic and lymphatic	5.87	180.87	5	1.81091	1.32107	3.30586	-2.05223	-9.14466	1.62155	1.13856	2.34	208
HD3	0	1	48	456	No	No	17.7	40.5	No	A	0	Multiple	3.4	No	Extrahepatic	1.13	23.74	5	-3.60641	-3.08778	-1.86377	-9.03593	-3.99465	-2.36144	-3.36575	228	10000
HD4	0	1	62	228	No	No	9	43	No	A	0	Single	5.3	No	Lymphatic	2.52	40.95	5	-1.21643	-0.849455	-0.196508	-2.75363	0.360008	-0.766803	-1.11238	0.7	5.2
HD5	0	1	73	158	No	Yes	20.3	37.1	No	A	0	Multiple	11.1	No	No	32	22.87	13.24	2.34947	1.17015	0.989555	1.07927	0.967736	0.176305	0.508158	304	67
HD6	1	0	59	166	No	Yes	22.7	33.4	0.2	B	1	Multiple	7.7	Yes	Extrahepatic and lymphatic	46.1	68.1	14.29	3.80275	1.84724	3.39606	0.947433	2.98892	1.45928	1.1877	5.7	441
HD7	1	0	40	185	No	Yes	27	28.6	0.3	B	0	Multiple	12.8	Yes	Lymphatic	171	2153.8	12.17	5.33517	3.83582	7.63751	0.276009	7.05673	4.94376	3.5784	2.1	90
HD8	0	1	54	302	No	Yes	13	29.1	No	B	0	Multiple	6.1	No	No	3.47	15.16	5	-2.1853	-2.54495	-1.77977	-5.38496	-4.47311	-2.10319	-2.74026	0.9	10000
HD9	1	0	71	100	No	Yes	372.5	28.3	2	B	0	Single	1.3	No	Lymphatic	11	21.56	5	2.39061	0.653516	1.22062	0.0936256	-21.2234	0.14281	0.459288	35.6	879
HD10	0	1	65	236	No	No	259.2	27.6	No	B	0	Single	0.4	No	No	2.45	288.53	5	0.152703	1.44179	2.58549	-2.72117	-13.7249	1.51911	1.17116	2.5	44.2
HD11	1	0	59	314	No	Yes	15.9	39.4	No	A	0	Multiple	9.7	Yes	Lymphatic	3.92	19.63	5	0.207873	-1.00718	0.168242	-3.99961	-0.653779	-0.956669	-1.24765	1.7	357
HD12	1	0	69	326	No	Yes	571.6	28.4	2.5	B	0	Single	3.5	No	No	115	21396.2	12.93	8.89858	8.97479	11.9379	-0.287265	-20.8328	8.6669	8.48819	5.1	944
HD13	0	1	53	266	No	No	11.5	36	0.9	A	0	Multiple	8.2	Yes	Lymphatic	2.96	18.63	5	-2.31779	-2.49033	-1.60398	-4.79628	-2.90614	-1.98922	-2.69586	96.7	322
HD14	1	0	79	308	No	No	8.1	40.6	No	A	0	Single	7	No	Lymphatic	8.04	19.59	5	2.7367	1.23278	1.32156	-1.34103	1.74452	0.2778	0.965929	3.7	4595
HD15	1	0	48	355	No	Yes	13.3	39.6	0.1	A	2	Multiple	17.2	No	Lymphatic	24.4	61.88	10.64	1.96485	0.161352	2.30704	-4.2947	2.07928	0.571361	-0.242445	11.1	123
HD16	1	0	62	198	No	No	11.2	40.9	No	A	1	Multiple	7.9	Yes	Lymphatic	5.89	25.16	5	1.03501	-0.306823	0.794982	-1.28623	1.3016	-0.370373	-0.519267	5.3	93.8
HD17	1	0	83	161	No	Yes	207.9	34.4	No	B	1	Single	2.6	No	No	1.52	39.14	5	1.8037	1.7317	1.80058	0.692303	-10.0893	0.525725	1.27773	4.3	140
HD18	1	0	74	360	No	Yes	10.5	31.9	No	B	0	Multiple	6.8	No	Lymphatic	1.55	39.66	5	1.02119	0.861384	1.43007	-3.0741	-0.184998	0.128596	0.454483	5.7	46.4
HD19	0	1	53	232	No	No	10	40	No	A	0	Multiple	5.6	No	No	2.22	22.05	5	-2.5128	-2.42225	-1.48486	-4.19006	-1.89216	-1.92447	-2.65639	1.1	6.6
HD20	0	1	60	186	No	Yes	11	34.6	No	B	0	Multiple	6.6	No	Extrahepatic and lymphatic	1.33	15.17	5	-2.61948	-2.30011	-1.88346	-2.90939	-3.07724	-2.22759	-2.62371	103	9871
HD21	0	1	57	275	No	No	192.5	33.8	7	B	1	Single	1.2	No	Lymphatic	2.63	19811.8	5	1.94761	5.01769	8.02441	-2.03505	-2.30313	5.84985	4.81636	2.1	382
HD22	1	0	63	394	No	No	25.7	41.1	No	A	0	Single	4.9	No	No	1.61	20.74	5	-0.304672	-0.87933	0.0771868	-5.30192	-1.55323	-1.08513	-1.23072	3	20.3
HD23	0	1	63	218	No	Yes	35.3	36.7	0.2	B	1	Single	1.4	No	No	2.85	118.82	5	-0.38606	0.388109	1.34654	-2.02886	-0.25969	0.509157	0.138351	1.5	145
HD24	0	1	47	143	No	Yes	12.1	35.1	No	A	1	Multiple	12.2	No	Lymphatic	1.76	21.07	5	-3.31503	-3.14763	-1.90006	-3.37036	-2.96139	-2.35279	-3.3758	2.9	2
HD25	1	0	70	188	No	No	12.8	35.9	0.1	A	1	Single	3.7	No	No	2.96	26.71	5	1.0903	0.295542	0.963996	-0.399333	0.65039	-0.221657	-0.027113	5.1	25
HD26	0	1	64	125	No	No	518.6	34	0.1	C	1	Single	2.7	No	Lymphatic	1.54	345.39	5	-0.30525	1.35808	2.60817	-2.01014	-27.7444	1.4751	1.0458	2.9	2788
HD27	0	1	60	306	No	No	301.7	36.1	0.3	B	1	Single	7	No	No	8.17	2766.3	5	2.23233	3.70692	5.909	-3.27723	-11.0672	4.29281	3.5965	4	17.4
HD28	0	1	73	129	No	Yes	16.2	34.9	0.1	B	1	Multiple	7.2	Yes	Extrahepatic and lymphatic	3.55	20.85	5	-0.268055	-0.328441	-0.500693	0.0563534	-1.10267	-0.85474	-0.614758	16.7	10000

## Sheet: Benign liver diseases
Patients (sequence number)	Gender (1 for male, 0 for female)	Gender for ASAP (0 for male, 1 for female)	Age (year)	Platelet (PLT, ×109/L)	Total bilirubin（TBIL, μmol/L）	Albumin（ALB, g/L)	Alpha fetoprotein (AFP, ng/mL)	Protein induced by vitamin K absence or antagonist-Ⅱ (PIVKA-Ⅱ,mAU/mL)	AFP-L3%	GALAD	GALAD-C	C-GALAD	C-GALAD II	GAP-TALAD	ASAP	GAAP	Carcinoembryonic antigen (CEA, ng/mL)	Carbohydrate antigen 19-9 (CA19-9, U/mL)	Diseases
HB1	0	1	63	228	13.4	43.1	2.63	27.39	5	-1.31531	-1.14777	-0.684175	-2.83403	-0.472131	-1.14657	-1.41341	0.633	8.87	Hepatic cyst
HB2	1	0	52	239	16.2	40.1	1.57	37.38	5	-0.979985	-1.37272	0.386313	-3.44018	-0.101316	-0.958022	-1.66862	14.31	0.656	Hepatic cyst
HB3	1	0	29	146	181	23.3	2.94	61.69	5	-2.12308	-2.90652	0.298181	-4.64401	-12.4857	-1.21259	-3.02051	6.5	536	Fatty liver disease
HB4	0	1	72	183	14	33.7	1.63	13.01	5	-1.42149	-1.19561	-1.48661	-1.50518	-2.7546	-1.75146	-1.55916	2.45	18.8	Hepatic cyst
HB5	0	1	62	291	22.4	36	1.96	26.71	5	-1.71864	-1.37985	-0.875451	-4.23606	-2.75258	-1.34523	-1.67076	1.4	2	Hepatic cyst
HB6	1	0	46	167	15.4	41.6	3.7	33.67	5	-0.709175	-1.76131	0.309347	-2.5835	0.502822	-0.991391	-1.93989	3	14	Hepatic hemangioma
HB7	0	1	32	167	9.4	38.8	1.93	24.76	5	-4.47811	-4.43331	-2.30469	-5.39659	-2.95804	-2.83544	-4.57619	1.1	37.8	Hepatic hemangioma
HB8	1	0	66	72	41.5	22.2	3.28	24.11	5	0.775467	-0.168152	0.687883	1.10651	-3.06338	-0.478131	-0.460819	3.7	34	Hepatic cyst
HB9	1	0	31	305	19.2	46	4.74	36.55	5	-1.76004	-3.07168	-0.143596	-6.68708	-0.380806	-1.496	-3.14944	1.73	15.9	Hepatic hemangioma
HB10	0	1	80	270	13.9	35.6	1.86	26.12	5	-0.164765	0.360115	-0.134019	-1.79525	-1.11879	-0.552094	-0.0262758	2.3	6.4	Hepatic cyst
HB11	0	1	70	288	12.1	35.5	1.82	27.56	5	-1.05586	-0.58272	-0.509241	-3.23519	-1.68	-0.968604	-0.92106	2.6	10.3	Hepatic hemangioma
HB12	1	0	65	222	14.7	40.4	1.79	32.17	5	0.236586	-0.191989	0.804156	-1.67145	0.781083	-0.461888	-0.540226	3.9	26.6	Hepatic hemangioma
HB13	1	0	26	165	16.1	36.2	16.9	33.96	9.88	-0.765358	-2.82213	0.332296	-3.85332	-0.378083	-1.27351	-3.10121	1.9	104	Chronic hepatitis B
HB14	1	0	71	197	10.3	38.3	2.84	33.17	5	1.26336	0.60183	1.28729	-0.349046	1.54392	0.0469163	0.271062	0.8	5.9	Hepatic cyst
HB15	0	1	21	307	14	45.6	1.41	26.78	5	-5.74184	-5.55631	-2.80247	-9.27116	-3.59998	-3.39467	-5.67596	0.3	6.9	Focal nodular hyperplasia
HB16	1	0	59	264	14.8	44.7	1.93	42.1	5	-0.0715007	-0.482329	0.935715	-2.96437	1.36925	-0.412747	-0.791446	3.1	18.4	Hepatic cyst
HB17	1	0	30	149	93.9	31.9	412	50.39	12.6	3.17698	-0.657344	2.44494	-1.93824	-2.6177	0.698395	-0.8256	1.05	6.11	Chronic hepatitis B
HB18	1	0	64	259	26.2	36	3.15	19.72	5	0.438273	-0.587259	0.310423	-2.54852	-1.34758	-0.810677	-0.875119	6.1	25	Hepatic cyst
HB19	0	1	52	207	15	36.7	2.89	26.28	5	-2.2334	-2.24485	-1.18832	-3.70315	-2.21035	-1.66577	-2.44604	0.819	6.62	Hepatic cyst
HB20	0	1	31	301	14.3	39.7	2.87	40.56	5	-3.87979	-3.88084	-1.52356	-7.59325	-2.77638	-2.16901	-3.97548	0.3	6.7	Focal nodular hyperplasia
HB21	0	1	49	231	9	43.4	10.6	39.57	5	-0.946287	-1.64757	-0.26307	-3.8313	0.38096	-0.804447	-1.69843	0.8	9.9	Hepatic cyst
HB22	0	1	39	250	8.9	38.8	3.23	20.26	5	-3.44064	-3.75837	-2.07212	-6.02311	-2.92249	-2.51293	-3.88452	1.3	7	Hepatic hemangioma
HB23	0	1	45	273	14.6	35.8	4.93	29.37	5	-2.25643	-2.62888	-1.13955	-5.46511	-2.6029	-1.64394	-2.73976	1.5	11.5	Hepatic hemangioma
HB24	0	1	44	262	7	33.9	2.3	33.5	5	-3.04525	-2.87094	-1.29728	-5.53729	-2.69829	-1.86727	-3.05427	0.6	2	Hepatic hemangioma
HB25	0	1	48	355	27.8	29.1	3.3	31.89	5	-2.34682	-2.39381	-1.04965	-6.75793	-4.79425	-1.58254	-2.5604	2.2	2	Hepatic abscess
HB26	0	1	38	279	16.7	37.7	1.12	20.65	5	-4.59599	-4.22419	-2.49722	-7.03661	-4.37942	-2.98595	-4.45379	0.7	21.5	Hepatic hemangioma
HB27	0	1	47	344	9.9	41.7	5.44	32.32	5	-1.9211	-2.29671	-0.883274	-6.42435	-1.37863	-1.40324	-2.40699	1.2	5.1	Hepatic hemangioma
HB28	1	0	39	174	247.6	30.1	54.8	40.14	10.95	1.7395	-0.856217	1.6517	-2.95881	-13.3956	0.0148325	-1.15697	1.4	98	Chronic hepatitis B
HB29	0	1	55	178	13.6	35.9	3.16	20.89	5	-2.00521	-2.15093	-1.33481	-2.90892	-2.24921	-1.74173	-2.35916	0.7	6.4	Hepatic hemangioma
HB30	1	0	90	132	11.4	31.6	1.6	17.63	5	2.02516	1.6246	1.04139	2.50112	0.537327	-0.00739741	1.13673	1.35	8.37	Hepatic cyst
HB31	0	1	54	267	12.6	37.3	2.86	24.24	5	-2.11068	-2.13362	-1.21445	-4.59238	-2.28339	-1.66615	-2.3463	0.5	4.2	Hepatic cyst
HB32	0	1	45	118	12	41.3	2.08	21.58	5	-3.31144	-3.26013	-1.89126	-3.07894	-1.82	-2.34911	-3.46106	0.7	14.4	Hepatic hemangioma
HB33	0	1	79	186	15.5	37.2	3.32	17.63	5	0.106979	0.0688965	-0.491053	-0.389557	-0.912588	-0.788452	-0.25516	1	5.9	Hepatic cyst
HB34	1	0	44	293	14.8	44.6	6.78	32.79	5	-0.288986	-1.76555	0.418035	-4.90184	0.582427	-0.858143	-1.8722	1.3	8.7	Hepatic hemangioma
HB35	0	1	39	173	13.7	42.6	5.31	16.77	5	-3.04465	-3.77112	-2.13871	-4.57488	-2.23252	-2.51188	-3.84731	0.3	8.7	Hepatic hemangioma
HB36	0	1	27	282	10	44.4	2.59	31.94	5	-4.48211	-4.55958	-2.06463	-7.83342	-2.38452	-2.66308	-4.64599	0.7	16.9	Focal nodular hyperplasia
HB37	0	1	31	302	7.5	42.8	2.7	15.92	5	-4.48202	-4.86326	-2.82155	-8.04317	-3.47782	-3.22838	-4.96904	2.4	30.4	Focal nodular hyperplasia
HB38	0	1	36	263	9.9	43.3	5.43	19.03	5	-3.21891	-3.93017	-2.08982	-6.46256	-2.3086	-2.50271	-3.98841	0.5	6.5	Liver angiomyolipoma
HB39	1	0	26	216	12.3	39.2	1.36	41.93	5	-3.39956	-3.88118	-0.656335	-5.96442	-1.45482	-2.10498	-4.06119	3	4.9	Focal nodular hyperplasia
HB40	0	1	66	235	11.8	44.6	2.94	18.99	5	-1.14363	-1.18616	-1.0085	-2.74769	-0.524531	-1.3643	-1.45728	2.56	30.2	Hepatic cyst
HB41	0	1	23	253	18.3	42.1	2.93	29.15	5	-4.76956	-5.00443	-2.31779	-7.80254	-3.44305	-2.89865	-5.05867	0.433	5.49	Fatty liver disease
HB42	0	1	40	234	17.8	44.6	5.17	34.33	5	-2.56799	-2.94634	-1.12862	-5.2537	-1.21315	-1.68471	-3.02652	0.5	6.1	Focal nodular hyperplasia
HB43	0	1	66	198	14.6	42.4	1.97	17.21	5	-1.60736	-1.43326	-1.29652	-2.26875	-1.26659	-1.64221	-1.74594	1.9	39.3	Hepatic cyst
HB44	0	1	64	282	11.2	41.7	2.38	16.71	5	-1.61225	-1.59256	-1.35203	-3.95394	-1.65938	-1.68825	-1.87601	1.4	18.3	Hepatic cyst
HB45	0	1	74	186	13.9	39.7	1.67	23.82	5	-0.867511	-0.367828	-0.565053	-1.03791	-0.64171	-0.979465	-0.735743	2.2	39.2	Hepatic cyst
HB46	0	1	74	334	28.3	30.4	4.58	16.23	5	-0.0638512	-0.39368	-0.700155	-3.62607	-3.7812	-0.977302	-0.660192	4	18.2	Hepatic abscess
HB47	0	1	66	211	19.4	44.7	5.16	23.78	5	-0.442038	-0.750009	-0.485752	-2.05402	-0.130418	-0.878077	-0.96231	2.7	90.9	Hepatic cyst
HB48	1	0	53	29	33.2	29	2.36	16.45	5	-0.949885	-1.96774	-0.531644	0.149474	-2.92541	-1.64633	-2.23114	0.9	8.3	Liver cirrhosis
HB49	1	0	52	41	15.1	42.6	2.36	20.54	5	-0.911627	-1.83877	-0.273033	0.000783811	0.598231	-1.44759	-2.09601	1.7	2	Liver cirrhosis
HB50	1	0	36	71	480.4	36	18.2	41.59	14.67	0.518622	-1.24734	1.37876	-2.42614	-26.4055	-0.551576	-1.91745	4.5	106	Liver cirrhosis
HB51	0	1	78	48	18.6	28.1	2.72	9.14	5	-0.56505	-0.777285	-1.50696	1.60533	-3.15786	-1.64537	-1.1202	2	10.8	Liver cirrhosis
HB52	0	1	50	576	48.5	34	2.61	166.15	5	-1.4518	-0.586759	1.19766	-9.91843	-3.59935	0.235919	-0.778786	1.4	64.6	Liver cirrhosis
HB53	0	1	44	189	11	36.8	19.8	15.81	11.67	-1.02442	-2.36962	-1.07299	-3.23204	-1.56073	-1.78775	-2.82313	0.9	22.2	Liver cirrhosis
HB54	1	0	60	200	14.9	42.2	1.2	26.27	5	-0.736834	-1.04088	0.154341	-2.07179	0.269747	-1.08805	-1.40616	2.2	88.3	Liver cirrhosis
HB55	1	0	79	106	11.8	29.9	5.84	9.91	5	2.01818	0.416505	0.269954	1.87234	-0.523598	-0.610411	0.113331	13.6	22.1	Liver cirrhosis
HB56	1	0	65	184	31.3	33.2	3.87	29.82	5	0.976339	0.0114133	0.997129	-0.835964	-0.849108	-0.220008	-0.258193	6.6	2	Liver cirrhosis
HB57	0	1	54	98	18.1	41.7	3.21	28.06	5	-1.90882	-1.94126	-0.970644	-1.44998	-0.745601	-1.45565	-2.14134	0.3	7.2	Liver cirrhosis
HB58	1	0	49	69	17.9	31.8	2.25	34.39	5	-0.932438	-1.62404	0.279006	-0.632862	-0.805633	-1.03814	-1.86849	2.52	14.1	Liver cirrhosis
HB59	1	0	44	296	92.9	31.6	5.39	238.26	5	0.623396	0.186883	3.03264	-4.43284	-3.02614	1.23679	0.067063	8.59	47.6	Liver cirrhosis
HB60	1	0	47	15	36.6	29	1.58	20.02	5	-1.7842	-2.50647	-0.682194	-0.335763	-3.3548	-1.87874	-2.77997	1.7	7.5	Liver cirrhosis
HB61	1	0	54	58	41.7	30.1	6.89	106.07	5	1.30547	0.435605	2.46413	0.934756	0.425579	0.912757	0.286732	2.8	26.3	Liver cirrhosis
HB62	1	0	31	189	83.2	24.5	2.98	362.97	5	-0.905706	-0.884124	2.80656	-3.93384	-3.5341	0.845058	-0.99749	4.2	2	Liver cirrhosis
HB63	1	0	43	54	13.5	34.9	3.6	37.09	5	-0.951141	-1.96898	0.298656	-0.835476	0.0567903	-1.03604	-2.13486	1.3	27.2	Liver cirrhosis
HB64	1	0	50	89	23.1	40.1	5.26	14.66	5	-0.471935	-2.09063	-0.512599	-1.02452	-0.736995	-1.57507	-2.25749	2.1	2	Liver cirrhosis
HB65	1	0	51	31	48.6	29.7	5.78	33.69	5	0.194487	-1.10297	0.701604	0.453049	-2.13674	-0.568981	-1.26082	0.6	39.3	Liver cirrhosis
HB66	0	1	55	53	104.9	24.9	6.66	70.97	5	-0.541141	-0.623341	0.618447	-0.216064	-6.37726	-0.0751502	-0.748788	3.8	53.6	Liver cirrhosis
HB67	1	0	57	116	18.3	37.4	54.8	28.1	10.23	3.12473	0.507107	1.91235	0.891388	2.32674	0.460662	0.167054	8.4	48	Liver cirrhosis
HB68	1	0	53	248	30	43.9	1.78	26.08	5	-0.970328	-1.5975	-0.0120051	-3.67663	-0.826406	-1.25616	-1.8874	2.57	13.5	Liver cirrhosis
HB69	1	0	40	169	18.6	42.1	9.15	35.27	5	-0.302225	-1.97734	0.456616	-2.99633	0.617751	-0.837582	-2.03288	5.6	24.5	Liver cirrhosis
HB70	1	0	22	225	31.2	41.7	1.08	33.76	5	-4.11901	-4.58378	-1.21629	-6.84294	-2.9886	-2.62854	-4.76855	0.3	3.5	Hepatic hemangioma
HB71	0	1	68	186	14.3	41.7	1.77	14.14	5	-1.64964	-1.47604	-1.51743	-1.95027	-1.56666	-1.81126	-1.81071	2.6	15.3	Hepatic cyst
HB72	0	1	37	297	8.7	40.7	1.53	13.68	5	-4.60683	-4.63215	-2.98251	-7.53304	-4.07341	-3.35593	-4.82693	0.7	14.7	Liver angiomyolipoma
HB73	1	0	65	177	10.5	32.2	2.41	30.45	5	0.507091	-0.139905	0.843582	-0.766501	0.0240633	-0.396979	-0.457946	0.4	5.9	Hepatic cyst
HB74	0	1	30	291	11.4	36.9	7.1	14.32	5	-3.65065	-4.71829	-2.63829	-7.70524	-4.26874	-2.98368	-4.72053	1.8	2	Hepatic adenoma
HB75	1	0	35	351	12.8	45.1	2.97	30.67	5	-1.97642	-3.02629	-0.386303	-7.27334	-0.689754	-1.70067	-3.17288	0.8	3.8	Focal nodular hyperplasia
HB76	0	1	47	287	8.7	36.9	2.08	15.71	5	-3.31482	-3.38807	-2.23591	-6.04531	-3.57932	-2.60665	-3.60065	0.6	6.3	Hepatic cyst
HB77	0	1	55	287	18.9	41.7	2.38	14.07	5	-2.52158	-2.66011	-1.98238	-5.18462	-3.01051	-2.29827	-2.89946	0.8	9.6	Hepatic hemangioma
HB78	0	1	56	161	11.2	38.2	1.67	16.07	5	-2.71484	-2.5539	-1.89342	-2.81134	-2.40764	-2.25438	-2.83386	0.7	9.1	Hepatic hemangioma
HB79	0	1	51	327	11	45.1	1.87	24.32	5	-2.81056	-2.58224	-1.50527	-6.15237	-1.67271	-1.98199	-2.82345	1.6	16.2	Hepatic cyst
HB80	1	0	38	530	9.6	36.4	1.86	25.97	5	-2.27809	-3.0708	-0.660868	-10.3906	-3.16064	-1.94221	-3.28122	2.5	4.4	Hepatic abscess
HB81	1	0	51	346	35.2	21.6	1.01	40.92	5	-1.46601	-1.53975	0.296078	-5.67572	-4.93159	-1.09103	-1.87539	3.2	2	Hepatic abscess
HB82	0	1	53	154	13.5	38.9	4.58	20.6	5	-1.81613	-2.22789	-1.29922	-2.58603	-1.56921	-1.69373	-2.38816	14.6	2	Hepatic hemangioma
HB83	0	1	54	203	8.1	32.5	7.44	16.93	5	-1.34641	-2.15333	-1.33613	-3.26786	-2.49457	-1.65895	-2.2699	2.7	17.4	Hepatic cyst
HB84	0	1	43	457	8	22.4	0.93	262.24	5	-2.86688	-1.18767	1.11498	-8.51429	-2.74375	-0.022272	-1.44808	0.9	60.8	Hepatic abscess
HB85	0	1	73	243	9	39.6	3.67	21.8	5	-0.208534	-0.270569	-0.427194	-1.94409	-0.389396	-0.791454	-0.553247	2.8	17.8	Hepatic hemangioma
HB86	0	1	54	247	11.3	41.9	5.21	26.52	5	-1.44925	-1.82253	-0.861425	-3.98419	-0.854717	-1.31344	-1.97327	3.3	9.3	Hepatic cyst
HB87	0	1	33	154	14.3	40.9	2.09	20.09	5	-4.42789	-4.51983	-2.51492	-5.14057	-3.0874	-2.98612	-4.66064	1.7	2	Hepatic hemangioma
HB88	1	0	35	249	16.2	31	1.51	28.43	5	-2.70767	-3.35093	-0.749654	-5.70108	-3.18634	-2.07024	-3.56725	2.2	8.6	Hepatic abscess
HB89	1	0	49	208	42	33.2	2.62	38.08	5	-0.718848	-1.46386	0.476424	-3.15403	-2.45922	-0.861179	-1.69217	4.3	210	Hepatic abscess
HB90	1	0	53	301	15.1	39.2	2.62	24.07	5	-0.623812	-1.53882	0.0272686	-4.48191	-0.856809	-1.1815	-1.78952	2.1	6.6	Hepatic cyst
HB91	1	0	35	283	13	39.4	1.55	18.79	5	-2.9203	-3.76656	-1.30397	-6.48931	-2.49013	-2.51688	-3.98235	1.1	2	Hepatic abscess
HB92	0	1	50	230	6.5	32.8	2.68	19.43	5	-2.6645	-2.78042	-1.71687	-4.4782	-3.12245	-2.12472	-2.98092	1.7	7.3	Hepatic cyst
HB93	1	0	48	116	10.1	39.2	1.47	37.27	5	-1.40857	-1.79576	0.181002	-1.66679	0.434402	-1.17574	-2.07842	1.7	2	Hepatic cyst
HB94	0	1	50	174	10.2	42.9	5.16	24.07	5	-1.87504	-2.32156	-1.17323	-3.16304	-0.686909	-1.6113	-2.4538	1.9	2	Hepatic cyst
HB95	0	1	45	207	11.1	40.6	1.12	14.84	5	-4.15682	-3.87039	-2.63948	-5.06708	-3.32209	-3.02444	-4.13671	0.5	5.6	Falciform ligament pseudolesion
HB96	0	1	36	240	12.8	38.5	1.92	16.2	5	-4.36842	-4.47473	-2.70882	-6.47822	-4.03324	-3.11982	-4.64036	0.7	5.8	Hepatic hemangioma
HB97	1	0	50	332	7.2	29.8	1.1	34.49	5	-1.56801	-1.78312	0.0519138	-5.46829	-2.16066	-1.29057	-2.1059	1.4	9.8	Hepatic abscess
HB98	0	1	67	267	12	38.8	5.4	21.24	5	-0.371083	-0.750396	-0.578221	-2.96002	-1.01433	-0.937049	-0.963625	0.8	5.4	Hepatic cyst
HB99	0	1	50	187	10	39.2	4.49	21.92	5	-2.07043	-2.46837	-1.3542	-3.48756	-1.57574	-1.77346	-2.61535	1.1	17.3	Hepatic hemangioma
HB100	1	0	66	191	18.9	40.1	2.15	26.91	5	0.409691	-0.209436	0.675277	-1.03801	0.510472	-0.535129	-0.544821	1.1	7.5	Hepatic hemangioma
HB101	1	0	83	108	13.4	31.6	5.09	30.61	5	2.88992	1.92022	1.93008	2.7715	1.70733	0.764591	1.58884	3.7	26.6	Hepatic cyst
